# Supplementary material for: Technical, economic, and environmental feasibility assessment of solar-battery-generator hybrid energy systems: a case study in Nigeria
Source: Frontiers journal article supplement (doi:10.3389/fenrg.2024.1397037), 2024-05-14
Supplement: Data_Sheet_1.PDF [file Data_Sheet_1.PDF]

## Supplementary Materials

### Section 1

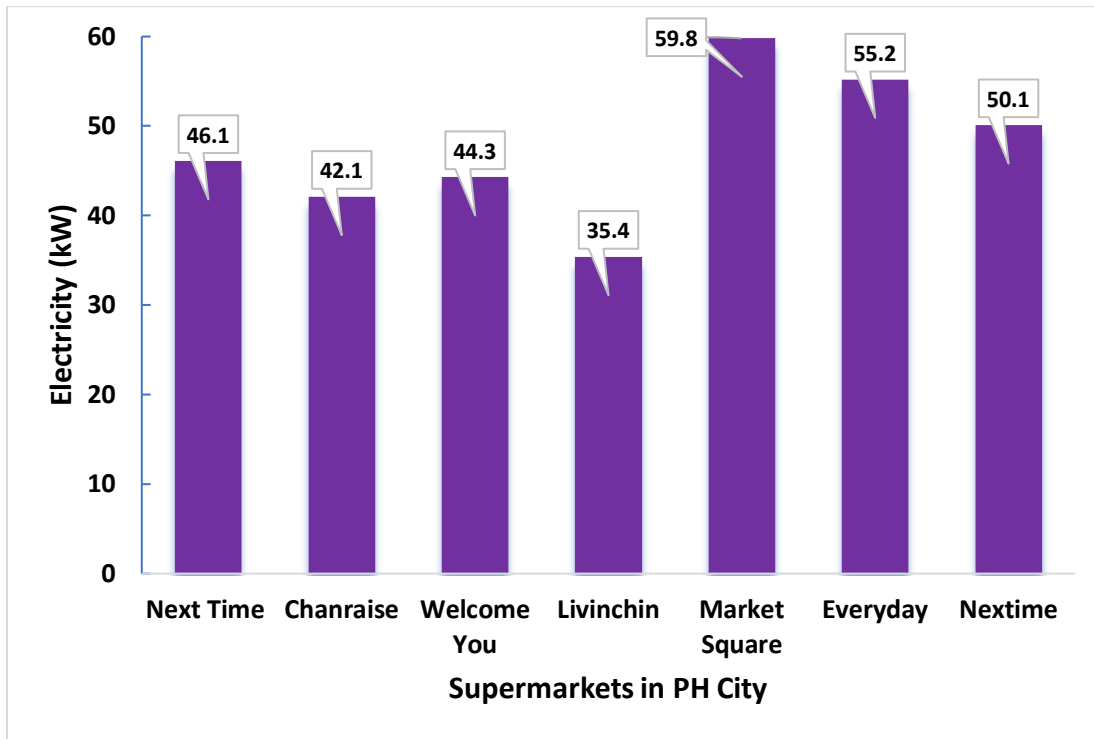

Figure 1: The power consumption of different supermarkets in Port Harcourt.

Table 1: Electrical load at Market Square Supermarket (Source: Ijeoma et. al. 2023)

| Appliance                            | Rating (W) | Quantity | Total Power Rating (kW) | Daily Usage (h/day) | Energy (E) (kWh/day) |
|--------------------------------------|------------|----------|-------------------------|---------------------|----------------------|
| Refrigeration – back freezer         | 1125       | 2        | 2.25                    | 24                  | 54.0                 |
| Refrigeration – back cooler          | 1100       | 2        | 2.20                    | 24                  | 52.8                 |
| Refrigeration – store freezer closed | 1100       | 8        | 8.80                    | 2                   | 35.2                 |
| Refrigeration – store freezer open   | 1300       | 3        | 3.90                    | 2                   | 15.6                 |
| Refrigeration – store cooler closed  | 1100       | 9        | 9.90                    | 2                   | 39.6                 |
| Lighting – Fluorescent               | 32         | 155      | 4.96                    | 12                  | 59.8                 |
| Air Conditioning                     | 22,500     |          | 22,500                  | 12                  | 270                  |
| Cooking machine                      | 1782       |          | 1.78                    | 2                   | 3.6                  |
| Water Heater                         | 1100       |          | 1.10                    | 2                   | 2.2                  |
| ICT – ATM Machine                    | 700        | 1        | 0.70                    | 12                  | 8.4                  |
| ICT – Computer, Printer              | 158        | 3        | 0.47                    | 12                  | 5.7                  |
| ICT – Register                       | 200        | 6        | 1.20                    | 12                  | 14.4                 |
| <b>TOTAL</b>                         |            |          | <b>59.8</b>             |                     | <b>561</b>           |

## Section 2

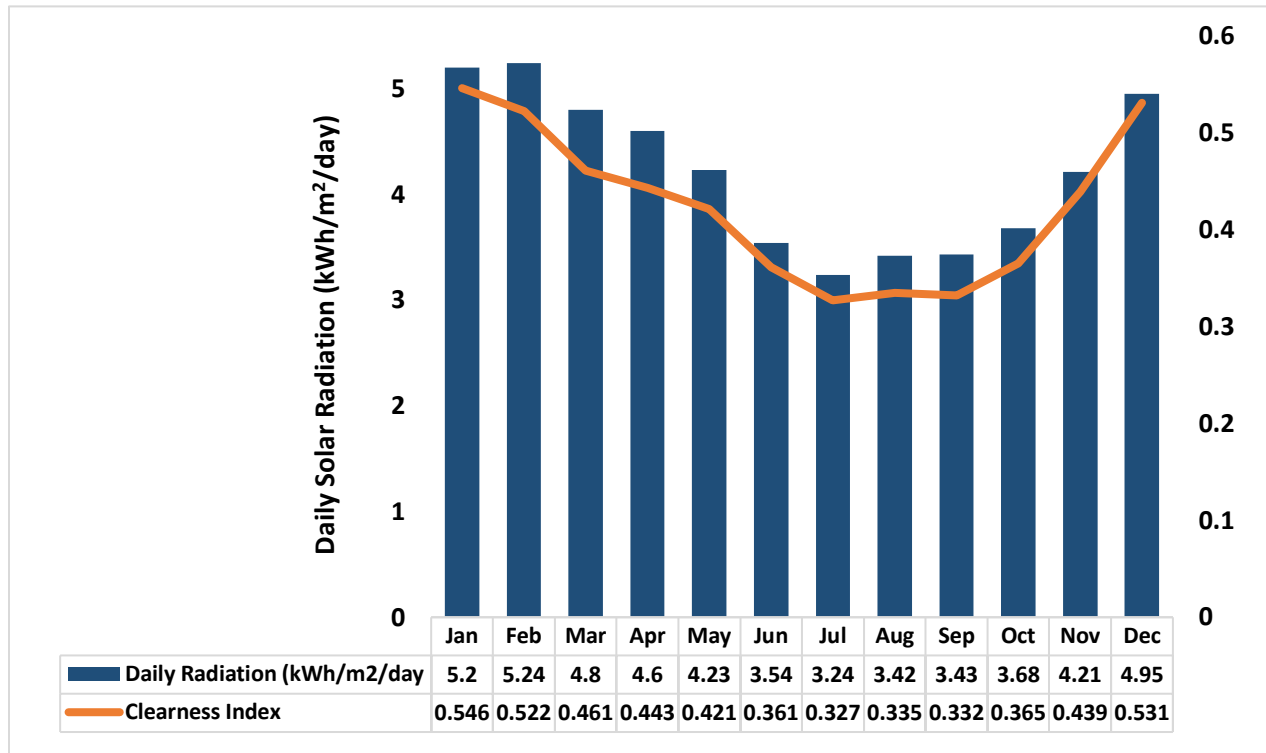

Figure 2: The monthly average horizontal irradiance and clearness index breakdown from NASA's POWER database. This breakdown contains data from January of 1984 to December of 2013.

Provide additional information about the city's daily solar profile and temperature (1). February and July witnessed the highest and lowest levels of solar radiation, measuring 5.24 kWh/m<sup>2</sup>/day and 3.24 kWh/m<sup>2</sup>/day, respectively. The average amount of solar radiation is equivalent to 4.2 hours of peak sunlight daily, which indicates a considerable amount of solar energy available for conversion into electricity. The Figure also shows the clearness index of PH city.

Clearness index is the measure of the brightness and cloudiness of the sky at the site. This index is in the range of zero (0) and one (1) where zero indicates completely cloudy sky and one indicates perfectly sunny sky. The clearness index of the location shows a clear indication of the difference in the performance of solar system based on the clearness index of each month. The system could perform better from November to May, with January being the best month.

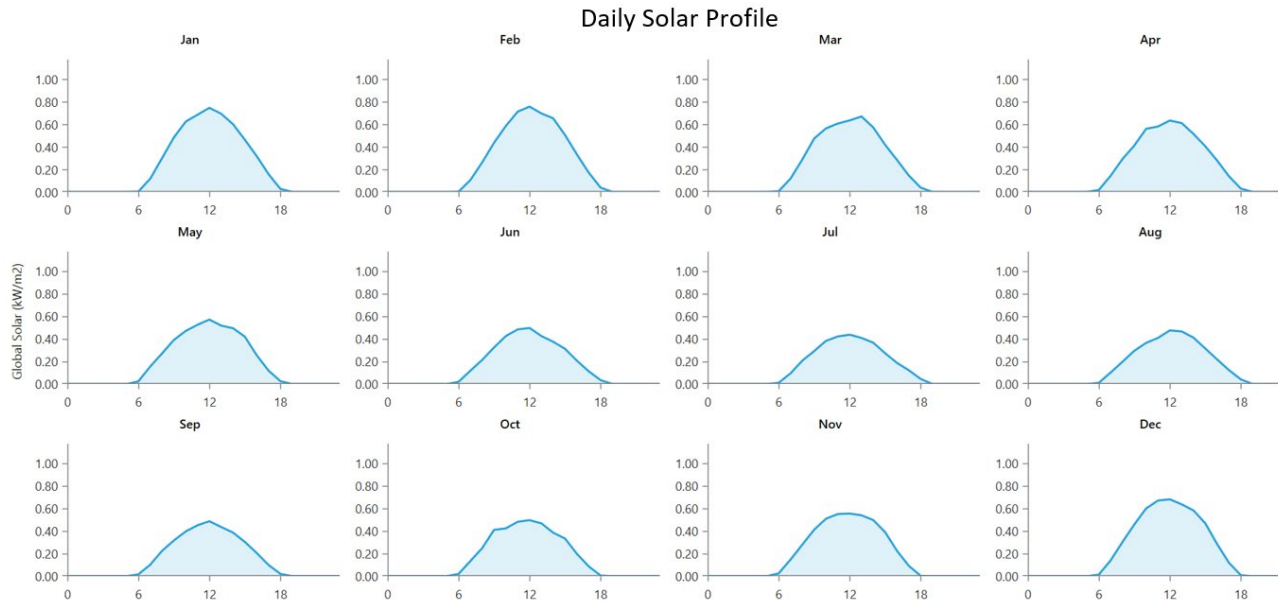

Figure 3: The average monthly daily solar profile for Port Harcourt in  $\text{kW/m}^2$ . These daily solar profile breakdowns of each month stem from data agglomerated from NASA's POWER database from January of 1984 to December of 2013.

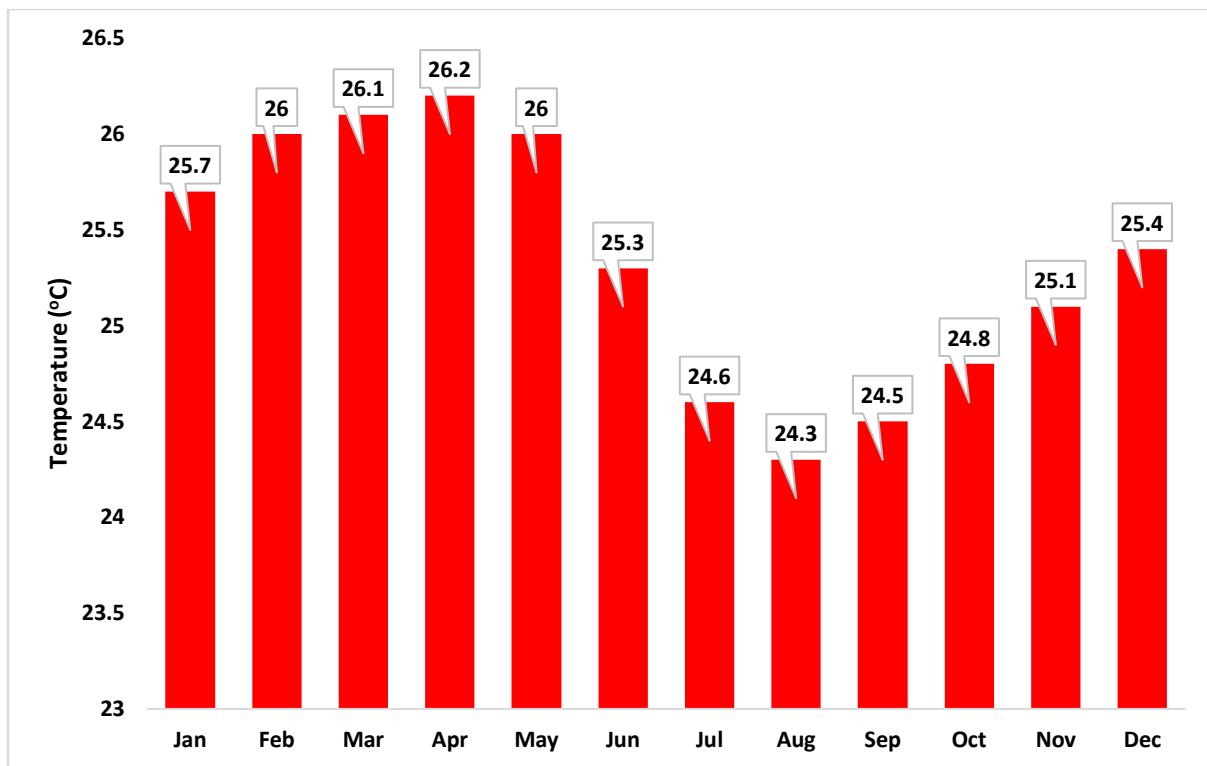

Figure 4: The monthly average temperature breakdown for Port Harcourt from NASA's Prediction of Worldwide Energy Resource (POWER) database. This breakdown contains data from January of 1984 to December of 2013.

### Section 3

- Solar PV module

HOMER calculations of Power output of PV module

The power out of a PV module is evaluated using Equation 1.

$$P_{out} = P_{pv} f_{pv} \left( \frac{G_T}{G_{T_{STC}}} \right) [1 + \alpha_p (T_c - T_{c_{STC}})] \quad \text{Equation 1}$$

Where  $P_{pv}$  is the rated power of the PV module at STC,  $f_{pv}$  is the derating factor of the PV module (%),  $G_T$  is the radiation incident on the PV module (W/m<sup>2</sup>),  $G_{T_{STC}}$  is radiation incident at STC of 1000 W/m<sup>2</sup>,  $T_c$  is the PV operating cell temperature (°C), and  $T_{c_{STC}}$  is the PV cell temperature at STC (25°C) (2).

- Battery Storage

The battery storage bank life is calculated in HOMER using the following equations:

$$R_{batt} = \frac{N_{bat} \times Q_{lifeime}}{Q_{thrpt}} \quad \text{Equation 2}$$

$$R_{batt} = R_{batt,f} \quad \text{Equation 3}$$

Where  $R_{batt}$  is the storage bank life (yr.),  $N_{bat}$  is the number of batteries in the storage bank,  $Q_{lifeime}$  is the lifetime throughput of a single storage (kWh) and  $R_{batt,f}$  is the storage float life (yr.)

- Generator System

HOMER utilizes the following equation to compute the average total efficiency of a generator system:

$$\mu_{get\_tot} = \frac{3.6 \times E_{gen} H_{gen}}{m_{fuel} LHV_{fuel}} \quad \text{Equation 4}$$

Where  $E_{gen}$  is the generators total annual electrical production in kWh/yr.,  $H_{gen}$  is the total generators annual thermal production in kWh/yr.,  $m_{fuel}$  is total fuel consumption in kg/yr., and  $LHV_{fuel}$  is the lower heating value of the fuel (MJ/yr.). We should note that the 3.6 in the equation represents 1 kWh = 3.6 MJ (3).

Table 2: Specification of the selected components of the hybrid PV/battery/generator energy system HOMER model

| Description                         | Specification             | Remarks/References                                                           |
|-------------------------------------|---------------------------|------------------------------------------------------------------------------|
| PV modules                          |                           |                                                                              |
| PV model                            | Generic flat plate        | Authors Selection in HOMER                                                   |
| Rated capacity                      | 380 kW                    | Model Specification in HOMER                                                 |
| Capital cost                        | \$180 USD/kW              | Alibaba (4) / Ijeoma et al. 2023 (1)                                         |
| Replacement cost                    | \$60 USD/kW               | Authors assumption                                                           |
| Operation and Maintenance           | \$2,084.9 (USD/year)      | 5% of initial investment cost / Ijeoma et al. 2023 (1)                       |
| Derating Factor                     | 80%                       | Authors conservative assumption                                              |
| Lifetime                            | 25 years                  | Model Specification in HOMER                                                 |
|                                     |                           |                                                                              |
| Inverter                            |                           |                                                                              |
| Inverter mode                       | Generic large plate       | Authors Selection in HOMER                                                   |
| Rated power                         | 354 kW                    | Model Specification in HOMER                                                 |
| Capital cost                        | \$23 USD/kW               | Ijeoma et.al. 2023 (1) /Alibaba ((5)                                         |
| Replacement cost                    | \$23 USD/kW               | Authors assumption                                                           |
| Conversion efficiency               | 95%                       | Model Specification in HOMER                                                 |
| Expected lifetime                   | 15 years                  | Model Specification in HOMER                                                 |
|                                     |                           |                                                                              |
| Storage battery                     |                           |                                                                              |
| Battery model                       | Hoppecke 24 OPzS 3000     | Authors Selection in HOMER                                                   |
| Nominal Voltage                     | 2V                        | Model Specification in HOMER                                                 |
| Maximum state of charge             | 610 A                     | Model Specification in HOMER                                                 |
| Minimum state of charge             | 30%                       | Model Specification in HOMER                                                 |
| Round trip efficiency               | 86%                       | Model Specification in HOMER                                                 |
| Nominal energy capacity per battery | 7.15 kWh                  | Model Specification in HOMER                                                 |
| Nominal capacity                    | 7.15 kWh                  | Model Specification in HOMER                                                 |
| Maximum Capacity                    | 3570 Ah                   | Model Specification in HOMER                                                 |
| Capital cost                        | \$300 USD/battery         | Ijeoma et. al. 2023(1) /Alibaba ((6))                                        |
| Replacement cost                    | \$100 USD/battery         | Authors assumption                                                           |
| Operation and Maintenance cost      | \$4,950 USD/year          | Authors assumption - 13 % of capital cost (Conservative)/ Ijeoma et al. 2023 |
| Float life                          | 15 years                  | Ijeoma et. al. 2023 (1)                                                      |
|                                     |                           |                                                                              |
| Generator                           |                           |                                                                              |
| Generator type                      | Autosize Genset           | Authors Selection in HOMER                                                   |
| Rated power                         | 91 KW                     | HOMER optimization selection                                                 |
| Capital cost                        | \$583 USD/kW              | Ijeoma et al. 2023/Alibaba (7)                                               |
| Replacement Cost                    | \$583 USD/kW              | Authors assumption                                                           |
| Operation and maintenance cost      | \$0.03 USD/operation hour | Authors assumption                                                           |
| Fuel Price                          | \$0.337 USD/kW            | HOMER Assumption based on \$0.673/L                                          |
| Expected Lifetime                   | 15,000 hours              | Ijeoma et al. (2023) (1)                                                     |
| Minimum load ratio                  | 25%                       | Authors Assumption                                                           |

## Section 4

- HOMER LCOE Calculations

LCOE is calculated in HOMER Pro using Equation 5.

$$LCOE = \frac{C_{ann\_tot} - C_{boiler} H_{served}}{E_{served}} \quad \text{Equation 5}$$

Where  $C_{ann\_tot}$  is the total annualized cost of the system in USD/yr.,  $H_{served}$  is the total thermal load served in kWh/yr.,  $C_{boiler}$  is the boiler marginal cost in USD/yr., and the  $E_{served}$  is the total electrical load served in kWh/yr. it's important to note that in wind and PV systems, that do not serve thermal load  $H_{served}$  is set to zero (8). The  $C_{ann\_tot}$  is calculated using Equation 6.

$$C_{ann\_tot} = C_{NPC} \times CRF \quad \text{Equation 6}$$

Where  $C_{NPC}$  is the total NPC, and CRF is the capital recovery rate, and it is calculated in HOMER using Equation 7 and Equation 8.

$$CRF = \frac{i(1+i)^n}{(1+i)^n - 1} \quad \text{Equation 7}$$

$$i = \frac{r-f}{1+f} \quad \text{Equation 8}$$

Where  $i$  is the annual real discount rate (%),  $n$  is the number of years (lifetime of the project), or is the nominal discount rate, and  $f$  is the inflation rate.

- NPV calculation

NPV can be calculated using the following equations:

$$NPV = \sum \frac{E_n[kWh]}{(1+r)^n} \times Unit\ Cost - Initial\ Cost - \sum \frac{C_{o\&m} + C_{repl}}{(1+r)^n} \quad \text{Equation 9}$$

$$NPV = Present\ Value\ of\ Benefit - Present\ Value\ of\ total\ investment \quad \text{Equation 10}$$

Where  $E_n$  is the energy generated,  $r$  is the interest rate, Unit Cost is the tariff rate,  $C_{o\&m}$  is the operation and maintenance cost,  $C_{repl}$  is the cost of replacement, and  $n$  is the discounted cash flow year.

- Salvage Value

HOMER assumes linear depreciation of components, meaning that the salvage value of a component is directly proportional to its remaining life. It also assumes that the salvage value depends on the replacement cost rather than the initial capital cost. HOMER calculates salvage value using the following equation:

$$S = C_{rep} \times \frac{R_{rem}}{R_{comp}} \quad \text{Example 11}$$

Where  $C_{rep}$  is the replacement cost (\$),  $R_{comp}$  is the component lifetime,  $R_{rem}$  is the remaining life of the component at the end of the project lifetime,  $R_{rep}$  is the replacement cost duration. They are calculated using the following equations:

$$R_{rem} = R_{comp} - (R_{proj} - R_{rep})$$

**Example 12**

$$R_{rep} = R_{comp} - INT\left(\frac{R_{proj}}{R_{comp}}\right)$$

**Example 13**

Where  $R_{proj}$  is the project lifetime, and  $INT()$  is a function that returns the integer amount of a real number.

## Section 5

Table 3: Description of pollutants from the diesel generator in HOMER

| Pollutant       | Description                                                                                                                                                                                                                                              |
|-----------------|----------------------------------------------------------------------------------------------------------------------------------------------------------------------------------------------------------------------------------------------------------|
| CO <sub>2</sub> | Nontoxic greenhouse gas                                                                                                                                                                                                                                  |
| CO              | Poisonous gas produced by incomplete burning of carbon in fuel. I prevent delivery of oxygen to the body's organs and tissue leading to dizziness, headache, and dexterity.                                                                              |
| UHC             | Gaseous poisoning results from the incomplete combustion of carbon in fuel. It obstructs oxygen delivery to the tissues and organs of the body, resulting in vertigo, pain, and impaired dexterity.                                                      |
| PM              | A combination of soot, smoke, and liquid droplets that can irritate the respiratory system and create haze in the air.                                                                                                                                   |
| SO <sub>2</sub> | Corrosive gas is produced during the combustion of fossil-fuels, such as diesel, oil, and coal. Induce respiratory complications, acid rain, and haze in the atmosphere.                                                                                 |
| NO <sub>2</sub> | A range of nitrogen compounds, including nitric oxide (NO) and nitrogen dioxide (NO <sub>2</sub> ), are produced during the high-temperature combustion of any fuel. As a result of these compounds, acid rain, respiratory issues, and pollution ensue. |

Table 4: Impact categories descriptions

| Impact Category                    | Reference Unit        | Description                                                                                                                                                                                                                                                                                                                                                 |
|------------------------------------|-----------------------|-------------------------------------------------------------------------------------------------------------------------------------------------------------------------------------------------------------------------------------------------------------------------------------------------------------------------------------------------------------|
| Global Warming Potential (GWP)     | kg CO <sub>2</sub> eq | Global warming, an average rise in atmospheric temperature at the Earth's surface and in the troposphere, can alter global climate patterns. Global warming has natural and human causes. Emissions of CO <sub>2</sub> , methane, etc. contribute to GWP.                                                                                                   |
| Acidification Potential (AP)       | kg SO <sub>2</sub> eq | A local environment becomes acidified as the hydrogen ion (H <sup>+</sup> ) concentration rises. Air emissions of acidifying compounds can travel hundreds of kilometers before depositing as acid rain, fog, snow, dust, or smoke particle matter on soil or water. Sulphur dioxide and nitrogen oxides from fossil fuel burning cause the most acid rain. |
| Eutrophication Potential (EP)      | kg N eq               | Eutrophication is the introduction of nutrients such as nitrates and phosphates into an aquatic environment that boosts biological production (algae and weeds) and causes algal biomass buildup.                                                                                                                                                           |
| Photochemical Smog Formation (PSP) | kg O <sub>3</sub> eq  | Diverse chemical reactions between nitrogen oxides (NO <sub>x</sub> ) and volatile organic compounds (VOCs) in sunlight generate ground-level ozone. The impact on human health can lead to various respiratory complications, such as exacerbating symptoms associated with bronchitis, asthma, and emphysema.                                             |

|                                |          |                                                                                                                                                                                                            |
|--------------------------------|----------|------------------------------------------------------------------------------------------------------------------------------------------------------------------------------------------------------------|
| Human Health Particulate (HHP) | PM2.5 eq | Particulate matter is a collection of small particles in ambient air that can cause adverse human health effects, including respiratory illness and death—for example, carbon monoxide and nitrogen oxide. |
|--------------------------------|----------|------------------------------------------------------------------------------------------------------------------------------------------------------------------------------------------------------------|

Table 5: TRACI 2.1 characterization factor.

| Impact Category                    | Factor  | Unit                                     |
|------------------------------------|---------|------------------------------------------|
| Global Warming Potential - Air     |         |                                          |
| Carbon dioxide                     | 1       | kg CO <sub>2</sub> eq/kg CO <sub>2</sub> |
| Acidification Potential - Air      |         |                                          |
| Nitrogen Oxides                    | 0.7     | kg SO <sub>2</sub> eq/kgNO <sub>2</sub>  |
| Sulfur Dioxide                     | 1       | kg SO <sub>2</sub> eq/kg SO <sub>2</sub> |
| Eutrophication Potential - Air     |         |                                          |
| Nitrogen Oxides                    | 0.0443  | kg N eq/kgNO <sub>2</sub>                |
| HH Particulate Air                 |         |                                          |
| PM10                               | 0.228   | PM2.5 eq/kg PM                           |
| Carbon Monoxide                    | 0.00036 | PM2.5 eq/kg CO                           |
| Sulfur Oxide                       | 0.0611  | PM2.5 eq/kg SO <sub>2</sub>              |
| Nitrogen Oxide                     | 0.00722 | PM2.5 eq/kg NO <sub>2</sub>              |
| Photochemical Smog formation - Air |         |                                          |
| Carbon Monoxide                    | 0.0556  | kg O <sub>3</sub> eq/kg CO               |
| Nitrogen Oxide                     | 24.8    | kg O <sub>3</sub> eq/kg NO <sub>2</sub>  |
| Eutrophication Potential - Water   |         |                                          |
| Nitrogen Oxide                     | 0.291   | kg N eq/kg NO <sub>2</sub>               |



## Section 6

Component design characteristics of the optimal BL system.

Table 6: Solar PV System Characteristics

| Flat Plate PV Characteristics |        |          |
|-------------------------------|--------|----------|
| Parameters                    | Value  | Units    |
| Rated Capacity                | 313    | kW       |
| Mean Output                   | 44.1   | kW       |
| Mean Output                   | 1059   | kWh/d    |
| Capacity Factor               | 14.1   | %        |
| Hours of Operation            | 4447   | hrs./yr. |
| Maximum Output                | 302    | kW       |
| PV Generation                 | 386574 | kWh/yr.  |
| PV Penetration                | 96.3   | %        |

kW-kilowatt, kWh/d-Kilowatt hour per day, hrs./yr. – hours per year, %-percent

Table 7: Converter/Inverter Characteristics

| Inverter Characteristics |         |        |
|--------------------------|---------|--------|
| Parameters               | Value   | Units  |
| Capacity                 | 117     | kW     |
| Energy In                | 2117591 | kW/yr. |
| Maximum Output           | 81.9    | kW     |
| Capacity Factor          | 19.6    | %      |

Table 8: Generator System Characteristics and Fuel Consumption

| Genset Characteristics      |       |            |
|-----------------------------|-------|------------|
| Parameters                  | Value | Units      |
| Rated Capacity              | 91    | kW         |
| Hours of Operation          | 180   | hrs./yr.   |
| Number of Starts            | 28    | starts/yr. |
| Operational Life            | 83.3  | yr.        |
| Capacity Factor             | 1.88  | %          |
| Electrical Production       | 15025 | kWh/yr.    |
| Mean Electrical output      | 83.5  | kW         |
| Mean Electricity Efficiency | 36.6  | %          |
| Genset Fuel Consumption     |       |            |
| Fuel Consumption            | 4177  | L          |
| Avg fuel per day            | 11.4  | L          |
| Avg fuel per hour           | 0.477 | L/hour     |
| Fuel Specific Consumption   | 0.278 | L/kWh      |

L-liter, L/kWh – liter per kilowatt hour

Table 9: **Battery Storage Characteristics**

| <b>Battery Characteristics</b> |              |              |
|--------------------------------|--------------|--------------|
| <b>Parameters</b>              | <b>Value</b> | <b>Units</b> |
| Rated Capacity                 | 2/3000       | V/Ah         |
| Batteries                      | 120          | qty.         |
| Strings Size                   | 30           | batteries    |
| Strings in Parallel            | 4            | strings      |
| Bus Voltage                    | 60           | V            |
| Nominal Capacity               | 858          | kWh          |
| Lifetime Throughput            | 1214196      | kWh          |
| Expected Life                  | 14.5         | yr.          |
| Energy In                      | 90279        | kWh/yr.      |
| Annual Throughput              | 83894        | kWh/yr.      |

V/Ah – voltage/Hour, qty – quantity,

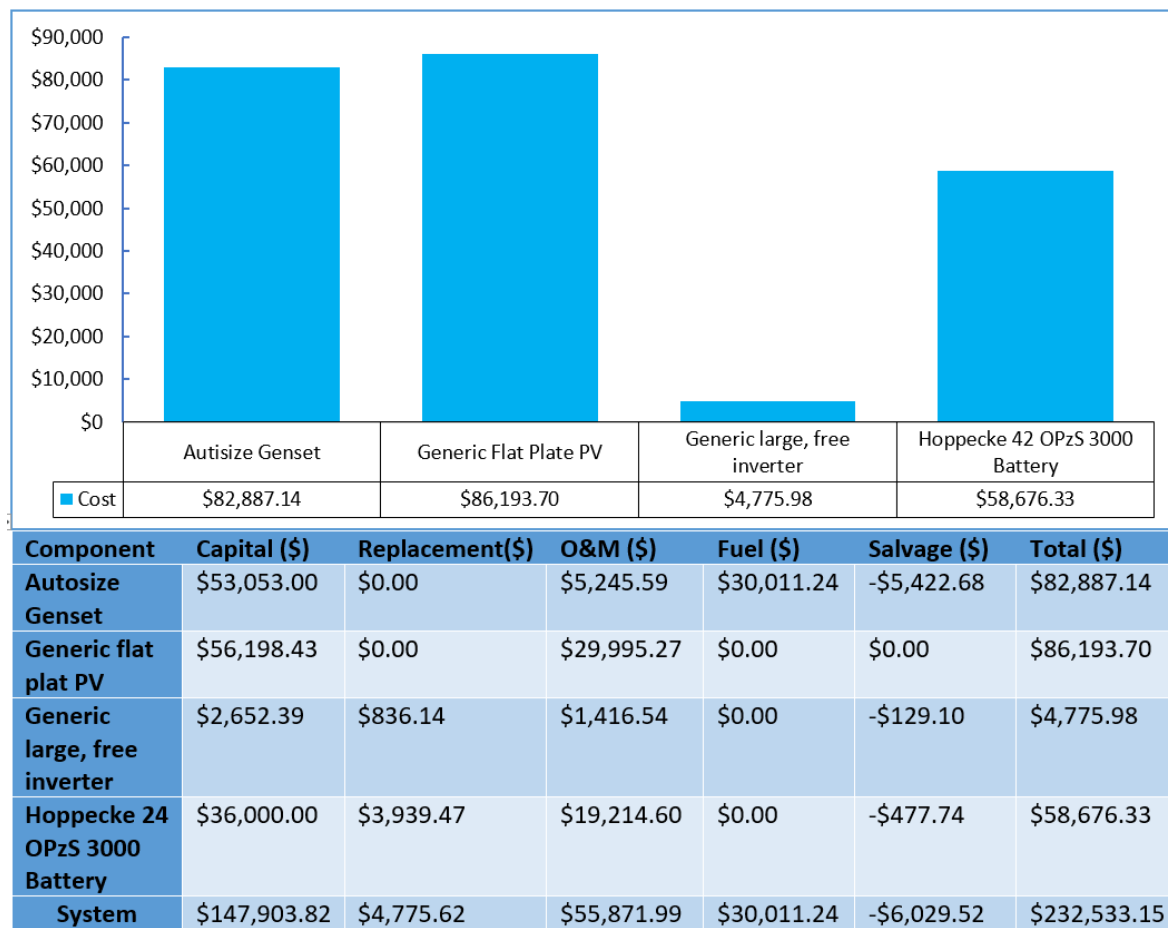

Figure 5: economic analysis results of the BL system.

Section 7

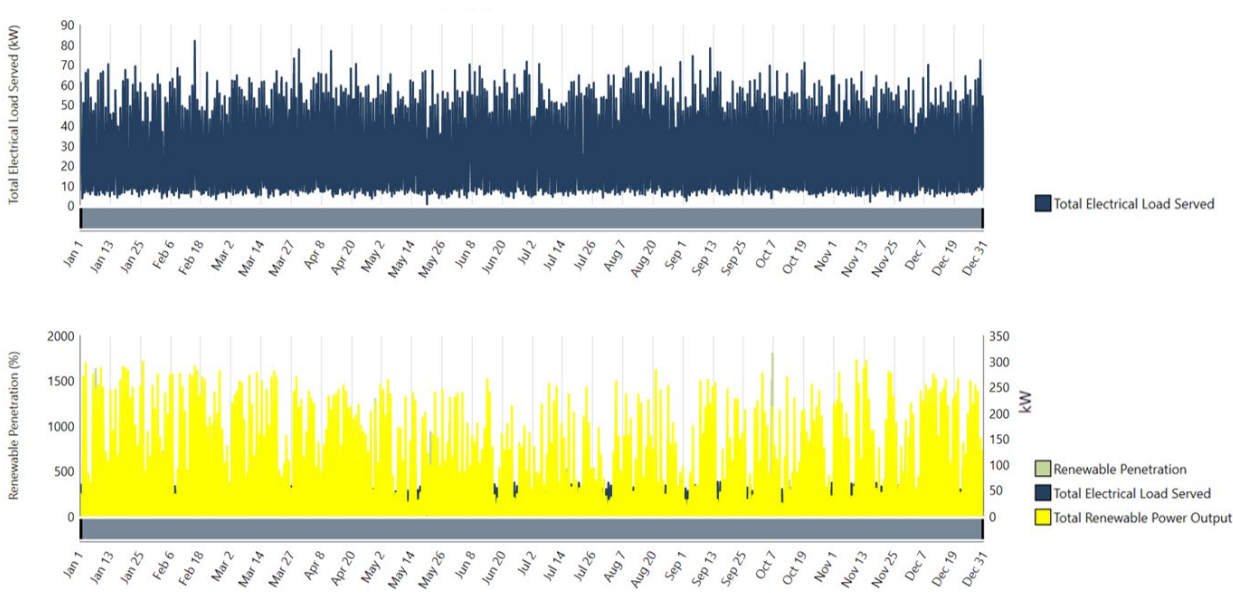

Figure 6: The annual total renewable power output for the Baseline System (BL) architecture.

Blue areas on the second graph indicate when the renewable energy output falls short of meeting the demand. These are the specific periods when the diesel generator is anticipated to activate and compensate for the unfulfilled energy requirement.

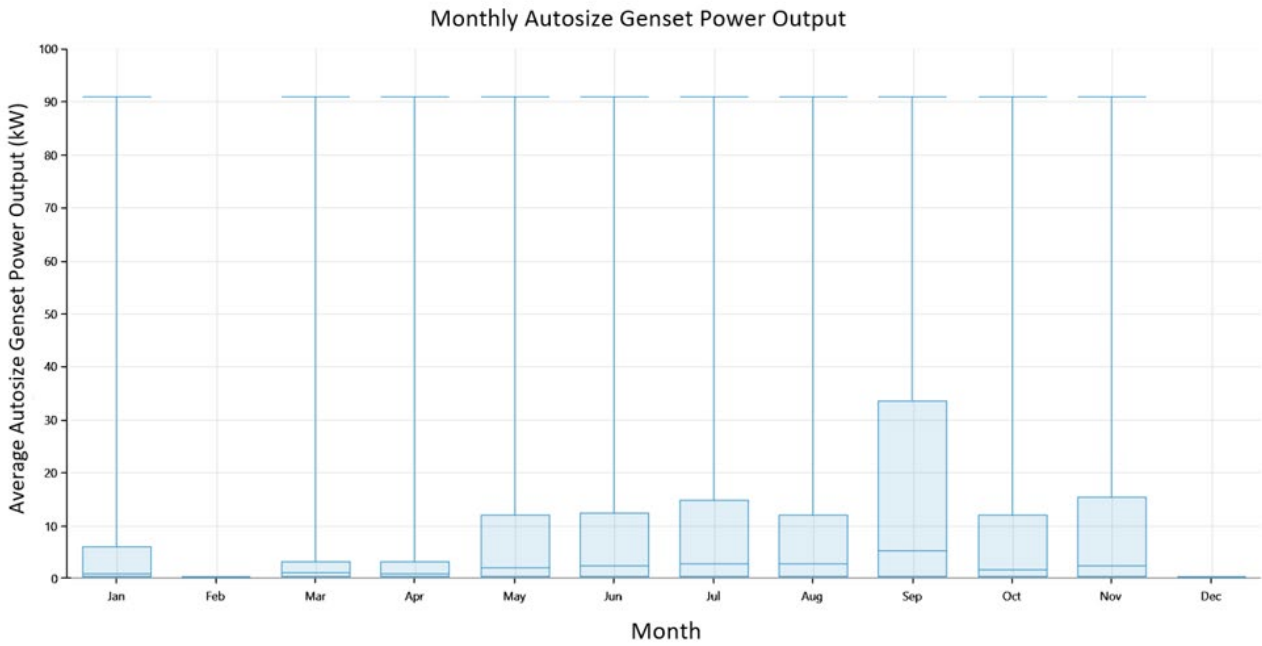

Figure 7: The mean monthly production of the diesel generator.

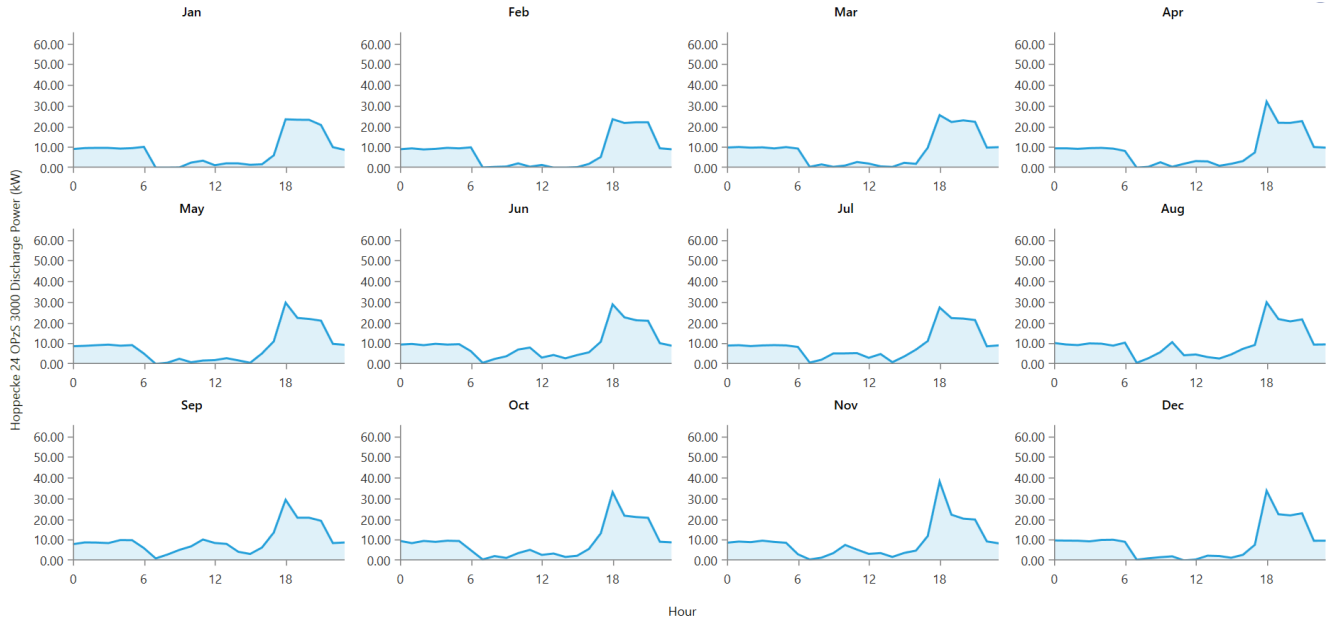

Figure 8: Average daily battery discharge profile for Baseline System (BL) architecture.

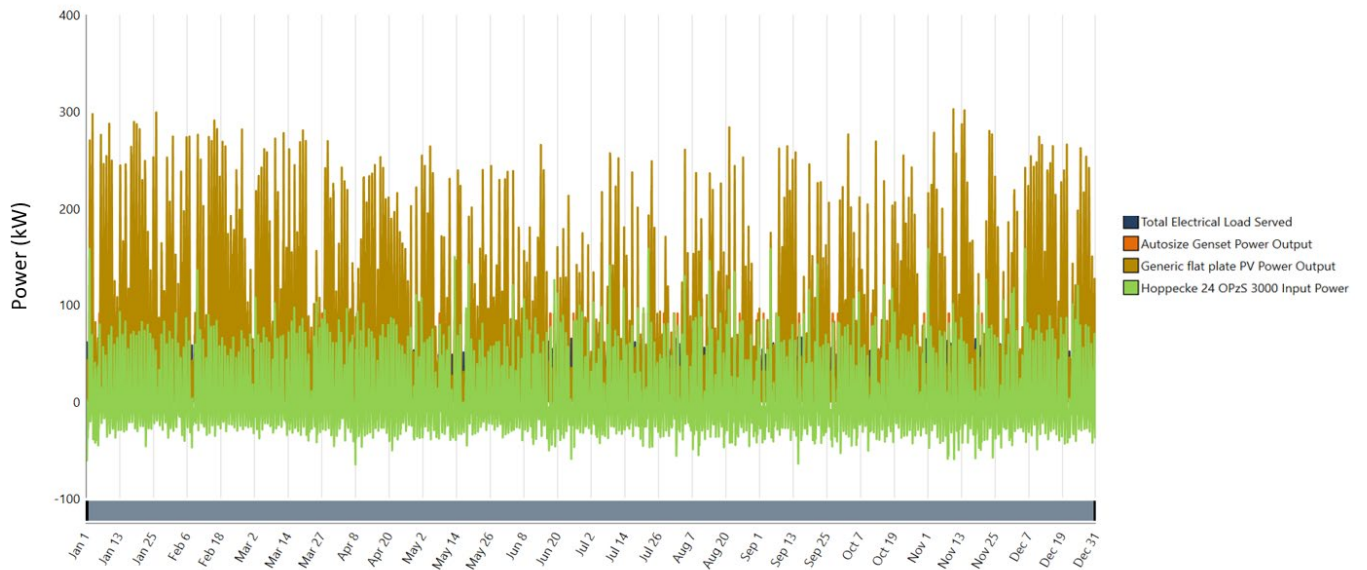

Figure 9: The time-series operation of the Baseline (BL) System.

The average daily battery discharge profile of the BL system architecture is shown in Figure 8. The findings indicate that the battery is functional during periods of insufficient energy generation by the PV system, specifically from 12 am to 6 am and 5 pm to midnight. During these time intervals, the battery system offsets the deficiency in energy generation by providing power to meet the required amount. This

further signifies the importance of the battery system in ensuring uninterrupted power delivery during insufficient solar energy production periods.

The time-series operation showing the comprehensive functioning of the entire system is shown in Figure 9. The graph shows the load being fulfilled by solar PV, with gold representing this. The green color represents the input power from the PV used to charge the battery. The orange indicates the instances when the generator is used to satisfy the load demand. The graph vividly depicts the fluctuating behavior of the system, as the battery undergoes charging during periods of abundant solar energy production and discharging during periods of limited solar energy generation.

This iterative system enables a smooth and uninterrupted switch between various power sources, guaranteeing a steady and continuous provision of electricity during the day and at night. The battery system serves as a contingency power supply, providing uninterrupted electricity during low solar energy generation and automatically activating when the PV's electricity is insufficient to meet load requirements.

## Reference

1. Ijeoma MW, Chen H, Carbajales-Dale M, Yakubu RO. Techno-Economic Assessment of the Viability of Commercial Solar PV System in Port Harcourt, Rivers State, Nigeria. *Energies* (Basel). 2023 Oct 1;16(19).
2. Jinko Tiger Neo N-Type Solar Panel 78hl4 545 w 620 620 w Wholesale Price Bifacial PV Module Rotterdam Europe Warehouse Buy Jinko Tiger Neo N-Type 54hl4 54hl4-b 78hl4 620 Bifacial Solar Panel, High Quality Tiger Neo Jinko Solar Panel, Jinko 530 w Bifacial Rotterdam Warehouse Price Product on Alibaba.com. Available online: [https://www.alibaba.com/product-detail/Jinko-Tiger-Neo-N-type-Solar\\_1600686533834.html?spm=a2700.7735675.0.0.34b5ZryYZryY6h&s=p](https://www.alibaba.com/product-detail/Jinko-Tiger-Neo-N-type-Solar_1600686533834.html?spm=a2700.7735675.0.0.34b5ZryYZryY6h&s=p) (accessed on 1 June 2023).
3. Big Capacity Battery 2 v 2000 ah 2500 ah 3000 ah Agm Sealed Lead Acid Batteries for Solar Panel-Buy 2 v 2000ah Vrla Agm Gel Lead Acid Storage Solar Battery, Maintenance Free Sealed Lead Acid 2 v 2000 ah Agm Gel Long Life Battery, Energy Storage 2 v 2000 ah Ups Long Life Agm Vrla Battery for Home Solar Power Product on Alibaba.com. Available online: [https://www.alibaba.com/product-detail/Big-Capacity-Battery-2V-2000Ah-2500AH\\_1600750514766.html?spm=a2700.galleryofferlist.0.0.3903d9c1UeUo8i](https://www.alibaba.com/product-detail/Big-Capacity-Battery-2V-2000Ah-2500AH_1600750514766.html?spm=a2700.galleryofferlist.0.0.3903d9c1UeUo8i) (accessed on 1 June 2023).
4. Growatt 100 kw 200 kw 300 kw 500 kw Hybrid Solar Inverter on off Grid for Project Application-Buy 200 kw off Grid Hybrid Solar Inverter, Hybrid Solar Inverter on off 20 kw,100 kw 200 kw 300 kw 500 kw Hybrid Solar Inverter Product on Alibaba.com. Available online: [https://www.alibaba.com/product-detail/Growatt-100Kw-200Kw-300Kw-500Kw-Hybrid\\_1600763410507.html?spm=a2700.galleryofferlist.0.0.f8aced02pJDHei](https://www.alibaba.com/product-detail/Growatt-100Kw-200Kw-300Kw-500Kw-Hybrid_1600763410507.html?spm=a2700.galleryofferlist.0.0.f8aced02pJDHei) (accessed on 1 June 2023).
5. Mantrac CAT. 80 kW to 100 kW Diesel Generators C4.4|Toromont Cat Power Systems. Available online: <https://www.toromontpowersystems.com/electric-power/products/diesel-generators/80-kw-to-100-kw-diesel-generators-c4.4> (accessed on 9 March 2022).
6. Your Diesel Generator—What Does It Truly Cost Your Business? Kpakpakpa. Available online: <https://kpakpakpa.com/diesel-generator-cost-business-nigeria/> (accessed on 9 May 2023).
